# Supplementary material for: Environmental Preferences and Concerns of Recreational Road Runners
Source: MDPI journal article supplement (doi:10.3390/ijerph18126268), 2021-06-10
Supplement: s1 [file s1]

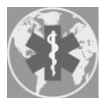

Article

# Environmental Preferences and Concerns of Recreational Road Runners

Nadine Schuurman <sup>1,\*</sup>, Leah Rosenkrantz <sup>1</sup> and Scott A. Lear <sup>2</sup>

<sup>1</sup> Faculty of Environment, Simon Fraser University, 8888 University Drive, Burnaby, BC V5A 1S6, Canada; lrosenkr@sfu.ca

<sup>2</sup> Faculty of Health Sciences, Simon Fraser University, 8888 University Drive, Burnaby, BC V5A 1S6, Canada; salear@sfu.ca

\* Correspondence: nadine@sfu.ca

**Citation:** Schuurman, N.; Rosenkrantz, L.; Lear, S.A. Environmental Preferences and Concerns of Recreational Road Runners. *Int. J. Environ. Res. Public Health* **2021**, *18*, 6268. <https://doi.org/10.3390/ijerph18126268>

Academic Editor: Paul B. Tchounwou

Received: 15 April 2021

Accepted: 4 June 2021

Published: 10 June 2021

**Publisher's Note:** MDPI stays neutral with regard to jurisdictional claims in published maps and institutional affiliations.

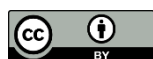

**Copyright:** © 2021 by the authors. Submitted for possible open access publication under the terms and conditions of the Creative Commons Attribution (CC BY) license (<http://creativecommons.org/licenses/by/4.0/>).

## Supplementary Material

Table S1. Questionnaire.

| No. | Question                                                                                                                                                                                                                                                                                                                                                                         |
|-----|----------------------------------------------------------------------------------------------------------------------------------------------------------------------------------------------------------------------------------------------------------------------------------------------------------------------------------------------------------------------------------|
| 1   | How important is it for you to run around/with others? (scale from 1 to 5, with 1 being not important and 5 being very important)                                                                                                                                                                                                                                                |
| 2   | Safety wise, what are your primary concerns while running? (Check all that apply) <ol style="list-style-type: none"> <li>Fear of people</li> <li>Distracted/aggressive drivers</li> <li>Other (please specify)</li> </ol>                                                                                                                                                        |
| 3   | How important is avoiding pollution from each of the following sources? (options included: 'not at all important', 'of minor importance', 'somewhat important', 'of major importance', 'very important') <ol style="list-style-type: none"> <li>Highways</li> <li>Traffic on arterial streets</li> <li>Forest fires</li> <li>Industry</li> <li>Other (please specify)</li> </ol> |
| 4   | How frequently do you seek out each of the following types of running surfaces? (options included: 'never', 'rarely', 'sometimes', 'often', 'always') <ol style="list-style-type: none"> <li>Sidewalks</li> <li>Asphalt/paved paths</li> <li>Unpaved paths</li> <li>Running tracks</li> </ol>                                                                                    |
| 5   | What features of the urban environment are conducive to running? (Check all that apply) <ol style="list-style-type: none"> <li>Trees along running routes</li> <li>Access to green spaces/parks</li> <li>Public toilets</li> <li>Water fountains</li> <li>Access to public transit</li> <li>Other (please specify)</li> </ol>                                                    |
| 6   | What is your age? <ol style="list-style-type: none"> <li>Under 18</li> <li>18-24</li> <li>25-34</li> <li>35-44</li> <li>45-54</li> <li>55-64</li> <li>65+</li> </ol>                                                                                                                                                                                                             |
| 7   | How many years have you been running?                                                                                                                                                                                                                                                                                                                                            |
| 8   | Approximately how many kilometers do you run a week? <ol style="list-style-type: none"> <li>Less than 10</li> <li>10-20</li> <li>20-30</li> <li>30-40</li> </ol>                                                                                                                                                                                                                 |

- 
- e. 40-50
  - f. 50-60
  - g. 60+
- 

How many days a week do you run?

- 9
- a. One
  - b. Two
  - c. Three
  - d. Four
  - e. Five
  - f. Six
  - g. Seven
- 

What is your gender?

- 10
- a. Woman
  - b. Man
  - c. Other
-
